# Supplementary material
Source: MDPI journal article supplement (https://www.mdpi.com/2073-4344/12/10/1196)
Supplement: s1 [file s1]

**Boron and phosphorus co-doped graphitic carbon nitride cooperate with  $\text{Bu}_4\text{NBr}$  as binary heterogeneous catalysts for the cycloaddition of  $\text{CO}_2$  to epoxides**

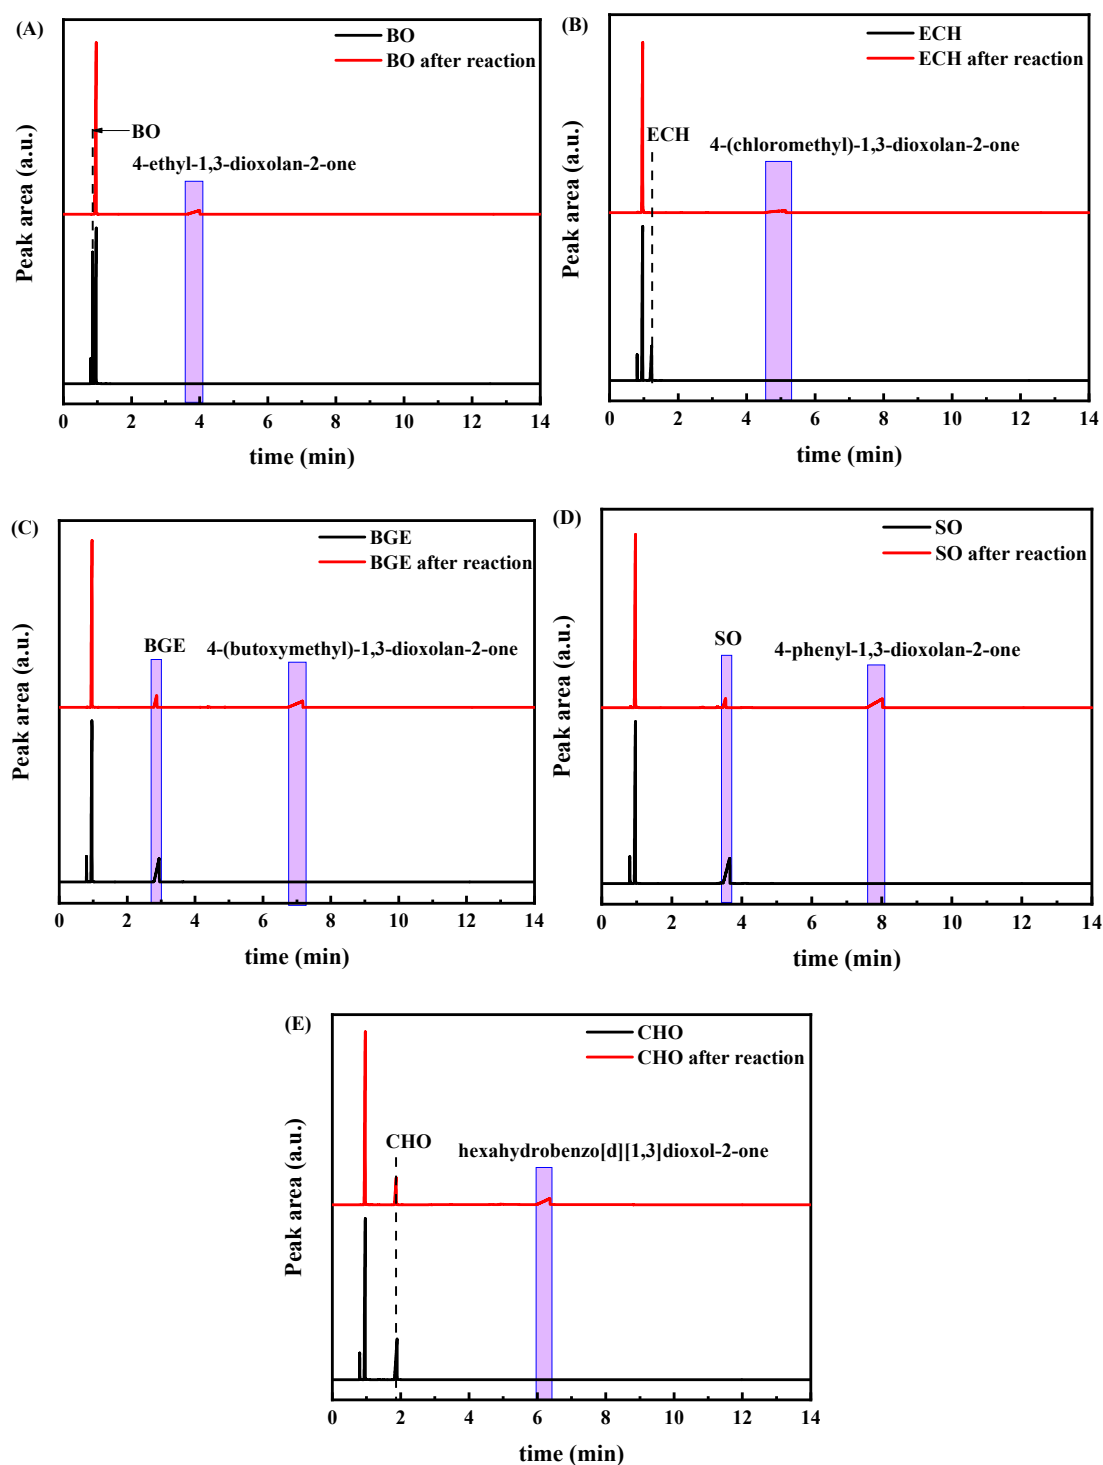

Figure S1. The GC-MS of (A) 1,2-epoxybutane (BO), (B) epichlorohydrin (ECH), (C) butyl glycidyl ether (BGE), (D) styrene oxide (SO) and (E) cyclohexene (CHO) before and after reaction
